# Supplementary material for: Four microRNAs Signature for Survival Prognosis in Colon Cancer using TCGA Data
Source: PubMed Central journal article supplement (PMC5156922; doi:10.1038/srep38306), 2016-12-15
Supplement: srep38306-s1.pdf [file srep38306-s1.pdf]

## **Four microRNAs Signature for Survival Prognosis in Colon Cancer using TCGA Data**

Jian Xu, Jian Zhao, Rui Zhang\*

Department of Colorectal Surgery, Cancer Hospital of China Medical University, Liaoning Cancer Hospital & Institute

Supplemental figure s1

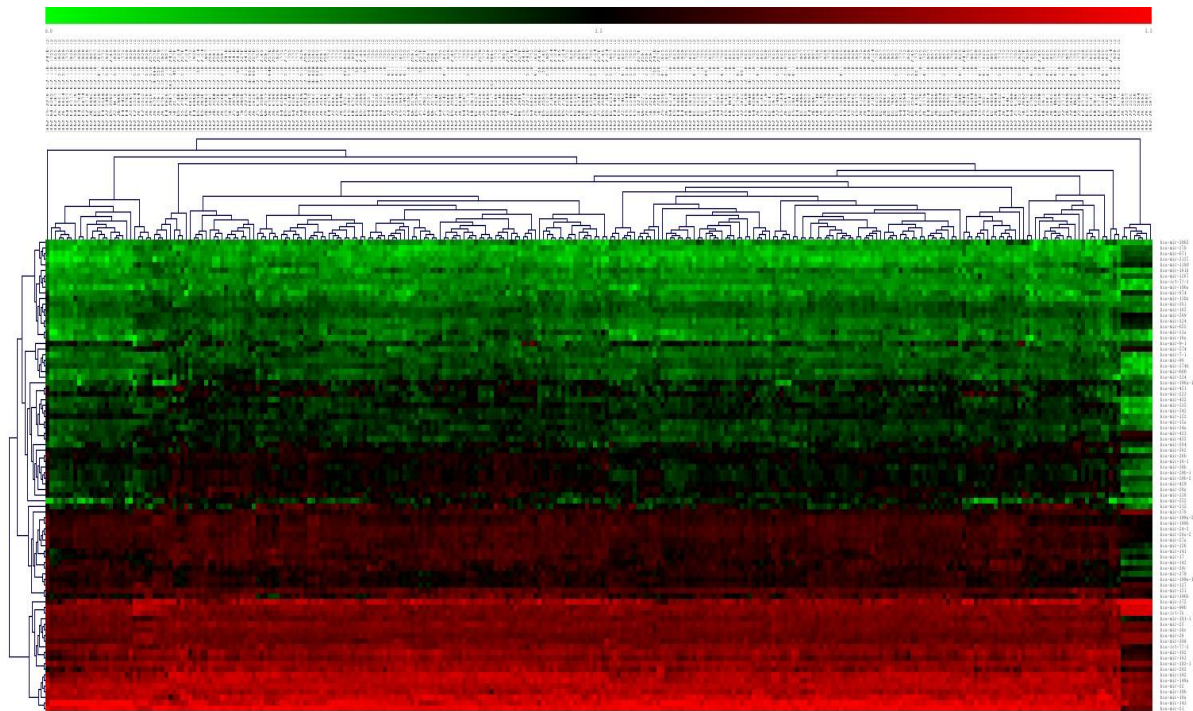

Supplemental figure s1. Hierarchical clustering of 84-miRNAs to classify cancer samples and non-cancer samples.

Supplemental figure s2

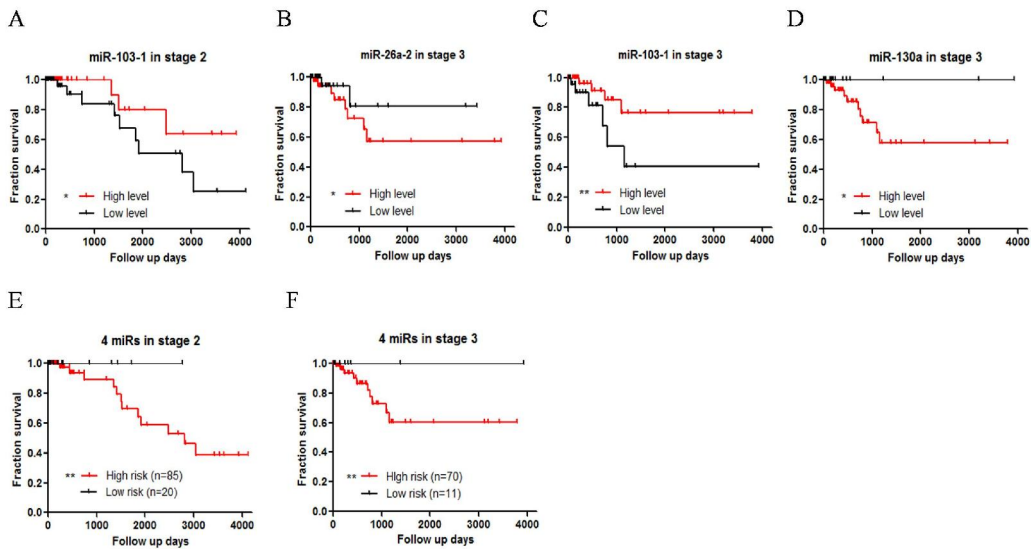

Supplemental figure s2. Four miRNAs signature in colon cancer stage 2 and stage 3. In the Kaplan-Meier survival analysis of four miRNAs one by one, results showed that only miR-103-1 was significant in stage 2 (A), while miR-26a-2, miR-103-1 and miR-130a were significant in stage 3 of patient survival (B, C and D). In the risk factor ranking aspect, score 2-4 was ranked as high risk, and score below 2 as low risk. Data showed the four miRNAs signature was significant both in stage 2 and stage 3 (E and F,  $**p < 0.01$ ).

Supplemental table s1. Summary of 84 microRNAs expression level

| <b>microRNA</b> | <b>Mean of Tumor<br/>(log, n=268)</b> | <b>Mean of Nontumor<br/>(log, n=8)</b> | <b>Expression level<br/>in colon cancer</b> |
|-----------------|---------------------------------------|----------------------------------------|---------------------------------------------|
| hsa-mir-21      | 5.31±0.02                             | 3.57±0.03                              | Up                                          |
| hsa-mir-101-1   | 3.75±0.03                             | 2.31±0.02                              | Up                                          |
| hsa-mir-379     | 2.89±0.03                             | 1.7±0.01                               | Up                                          |
| hsa-mir-98      | 1.71±0.03                             | 0.5±0.03                               | Up                                          |
| hsa-mir-542     | 2.18±0.03                             | 0.6±0.04                               | Up                                          |
| hsa-mir-335     | 2.26±0.04                             | 0.96±0.03                              | Up                                          |
| hsa-mir-452     | 2.06±0.04                             | 0.68±0.04                              | Up                                          |
| hsa-mir-141     | 3.15±0.04                             | 1.87±0.01                              | Up                                          |
| hsa-mir-182     | 4.16±0.04                             | 2.87±0.02                              | Up                                          |
| hsa-mir-142     | 3.07±0.05                             | 1.49±0.03                              | Up                                          |
| hsa-let-7f-2    | 4.01±0.03                             | 2.84±0.03                              | Up                                          |
| hsa-mir-29b-1   | 2.48±0.04                             | 1.12±0.03                              | Up                                          |
| hsa-mir-582     | 2.43±0.04                             | 1.05±0.04                              | Up                                          |
| hsa-mir-20a     | 2.69±0.05                             | 1.29±0.03                              | Up                                          |
| hsa-mir-203     | 4.09±0.05                             | 3.06±0.03                              | Up                                          |
| hsa-mir-126     | 3.16±0.03                             | 2.27±0.03                              | Up                                          |
| hsa-mir-552     | 2.12±0.08                             | 0.81±0.04                              | Up                                          |
| hsa-mir-429     | 2.53±0.05                             | 1.6±0.03                               | Up                                          |
| hsa-mir-152     | 2.26±0.03                             | 1.3±0.02                               | Up                                          |
| hsa-mir-374b    | 1.87±0.03                             | 0.7±0.04                               | Up                                          |
| hsa-mir-15a     | 2.09±0.03                             | 1.11±0.04                              | Up                                          |
| hsa-mir-660     | 1.67±0.04                             | 0.61±0.04                              | Up                                          |
| hsa-mir-183     | 3.85±0.04                             | 3.18±0.02                              | Up                                          |
| hsa-mir-10a     | 4.82±0.04                             | 4.02±0.03                              | Up                                          |
| hsa-mir-16-1    | 2.61±0.03                             | 1.64±0.03                              | Up                                          |
| hsa-mir-17      | 3.08±0.04                             | 2.28±0.03                              | Up                                          |
| hsa-mir-29b-2   | 2.49±0.04                             | 1.91±0.01                              | Up                                          |
| hsa-mir-148a    | 4.63±0.04                             | 3.79±0.03                              | Up                                          |
| hsa-mir-29c     | 2.99±0.04                             | 2.3±0.03                               | Up                                          |
| hsa-mir-199b    | 3.17±0.03                             | 2.62±0.02                              | Up                                          |
| hsa-mir-30b     | 2.44±0.04                             | 1.64±0.04                              | Up                                          |
| hsa-mir-7-1     | 1.65±0.04                             | 0.88±0.05                              | Up                                          |
| hsa-mir-181d    | 1.28±0.05                             | 0.75±0.02                              | Up                                          |
| hsa-mir-196a-1  | 2.24±0.07                             | 1.78±0.02                              | Up                                          |
| hsa-mir-199a-1  | 2.84±0.03                             | 2.52±0.01                              | Up                                          |
| hsa-mir-192     | 4.6±0.05                              | 4.06±0.02                              | Up                                          |
| hsa-mir-223     | 2.41±0.06                             | 1.8±0.03                               | Up                                          |
| hsa-mir-215     | 2.64±0.08                             | 1.51±0.06                              | Up                                          |
| hsa-mir-151     | 3.45±0.03                             | 2.96±0.02                              | Up                                          |
| hsa-mir-451     | 2.28±0.06                             | 1.7±0.03                               | Up                                          |
| hsa-mir-199a-2  | 3.07±0.03                             | 2.69±0.01                              | Up                                          |
| hsa-mir-143     | 5.14±0.05                             | 4.24±0.05                              | Up                                          |
| hsa-mir-26b     | 2.74±0.03                             | 2.22±0.02                              | Up                                          |
| hsa-mir-33a     | 1.49±0.06                             | 0.95±0.05                              | Up                                          |
| hsa-mir-10b     | 4.52±0.03                             | 4.01±0.03                              | Up                                          |
| hsa-mir-338     | 2.51±0.06                             | 1.99±0.03                              | Up                                          |
| hsa-mir-224     | 1.8±0.05                              | 1.35±0.04                              | Up                                          |
| hsa-mir-27a     | 3.16±0.03                             | 2.63±0.02                              | Up                                          |
| hsa-mir-25      | 3.94±0.03                             | 3.68±0.01                              | Up                                          |
| hsa-mir-24-2    | 3.29±0.02                             | 2.7±0.02                               | Up                                          |
| hsa-mir-196b    | 3.16±0.07                             | 2.87±0.04                              | Up                                          |
| hsa-mir-106a    | 1.06±0.04                             | 0.58±0.04                              | Up                                          |
| hsa-mir-22      | 4.67±0.02                             | 4.22±0.02                              | Up                                          |
| hsa-mir-30e     | 3.86±0.02                             | 3.47±0.02                              | Up                                          |
| hsa-mir-3065    | 1.01±0.05                             | 0.76±0.02                              | Up                                          |
| hsa-mir-34a     | 2.02±0.04                             | 1.51±0.04                              | Up                                          |
| hsa-mir-26a-2   | 3.23±0.02                             | 2.78±0.03                              | Up                                          |
| hsa-mir-381     | 1.63±0.03                             | 1.43±0.01                              | Up                                          |
| hsa-mir-130a    | 1.41±0.04                             | 1.2±0.03                               | Up                                          |
| hsa-mir-18a     | 1.35±0.06                             | 0.87±0.05                              | Up                                          |
| hsa-let-7f-1    | 1.23±0.02                             | 0.59±0.04                              | Up                                          |
| hsa-mir-9-1     | 2.01±0.06                             | 1.85±0.01                              | Up                                          |
| hsa-mir-103-1   | 4.22±0.03                             | 3.96±0.02                              | Up                                          |
| hsa-mir-185     | 1.77±0.03                             | 1.38±0.03                              | Up                                          |
| hsa-mir-584     | 2.38±0.06                             | 2±0.02                                 | Down                                        |
| hsa-let-7b      | 3.91±0.03                             | 5.03±0.01                              | Down                                        |

|              |           |           |      |
|--------------|-----------|-----------|------|
| hsa-mir-28   | 3.71±0.02 | 4.12±0.01 | Down |
| hsa-mir-30d  | 3.7±0.03  | 4.09±0.01 | Down |
| hsa-mir-423  | 2.14±0.03 | 3.06±0.01 | Down |
| hsa-mir-375  | 4.29±0.06 | 5.4±0.01  | Down |
| hsa-mir-378  | 3.02±0.04 | 3.94±0.01 | Down |
| hsa-mir-589  | 1.72±0.03 | 2.49±0.01 | Down |
| hsa-mir-455  | 2.1±0.04  | 2.73±0.01 | Down |
| hsa-mir-127  | 2.87±0.04 | 3.37±0.01 | Down |
| hsa-mir-574  | 1.73±0.04 | 2.87±0.01 | Down |
| hsa-mir-324  | 1.45±0.03 | 2.29±0.01 | Down |
| hsa-mir-1180 | 1.1±0.04  | 2.21±0.01 | Down |
| hsa-mir-874  | 1.24±0.05 | 2.11±0.01 | Down |
| hsa-mir-3127 | 0.82±0.04 | 1.88±0.02 | Down |
| hsa-mir-671  | 0.81±0.03 | 1.67±0.01 | Down |
| hsa-mir-370  | 0.88±0.04 | 1.56±0.01 | Down |
| hsa-mir-1287 | 1.18±0.03 | 1.62±0.01 | Down |
| hsa-mir-652  | 1.46±0.04 | 2.1±0.01  | Down |
| hsa-mir-99b  | 4.05±0.03 | 5.08±0.01 | Down |

Supplemental table s2. Four miRNAs signature for survival analysis

| Patients     | Status(dead<br>=1, alive=0) | Follow up<br>days | miR-148a | miR-26a-2 | miR-130a | miR-103-1 | miRNA<br>Index |
|--------------|-----------------------------|-------------------|----------|-----------|----------|-----------|----------------|
| TCGA-G4-6626 | 1                           | 1422              | 1        | 1         | 1        | 1         | 4              |
| TCGA-G4-6294 | 1                           | 858               | 1        | 1         | 1        | 1         | 4              |
| TCGA-AZ-6608 | 1                           | 59                | 1        | 1         | 1        | 1         | 4              |
| TCGA-AZ-6606 | 1                           | 357               | 1        | 1         | 1        | 1         | 4              |
| TCGA-AZ-6603 | 1                           | 899               | 1        | 1         | 1        | 1         | 4              |
| TCGA-AZ-6600 | 1                           | 368               | 1        | 1         | 1        | 1         | 4              |
| TCGA-AZ-6599 | 1                           | 206               | 1        | 1         | 1        | 1         | 4              |
| TCGA-DM-A1D4 | 1                           | 2821              | 1        | 1         | 1        | 1         | 4              |
| TCGA-DM-A28G | 1                           | 1849              | 1        | 1         | 1        | 1         | 4              |
| TCGA-DM-A1D6 | 1                           | 1518              | 1        | 1         | 1        | 1         | 4              |
| TCGA-DM-A0XF | 1                           | 1162              | 1        | 1         | 1        | 1         | 4              |
| TCGA-DM-A288 | 1                           | 427               | 1        | 1         | 1        | 1         | 4              |
| TCGA-DM-A1D8 | 1                           | 383               | 1        | 1         | 1        | 1         | 4              |
| TCGA-DM-A1D7 | 1                           | 0                 | 1        | 1         | 1        | 1         | 4              |
| TCGA-DM-A282 | 0                           | 4122              | 1        | 1         | 1        | 1         | 4              |
| TCGA-G4-6625 | 0                           | 2673              | 1        | 1         | 1        | 1         | 4              |
| TCGA-G4-6306 | 0                           | 1359              | 1        | 1         | 1        | 1         | 4              |
| TCGA-A6-2672 | 0                           | 503               | 1        | 1         | 1        | 1         | 4              |
| TCGA-G4-6295 | 0                           | 254               | 1        | 1         | 1        | 1         | 4              |
| TCGA-A6-6138 | 0                           | 182               | 1        | 1         | 1        | 1         | 4              |
| TCGA-A6-6649 | 0                           | 147               | 1        | 1         | 1        | 1         | 4              |
| TCGA-CM-6680 | 0                           | 91                | 1        | 1         | 1        | 1         | 4              |
| TCGA-NH-A6GC | 0                           | 40                | 1        | 1         | 1        | 1         | 4              |
| TCGA-AA-3496 | 0                           | 31                | 1        | 1         | 1        | 1         | 4              |
| TCGA-F4-6806 | 0                           | 20                | 1        | 1         | 1        | 1         | 4              |
| TCGA-F4-6808 | 0                           | 14                | 1        | 1         | 1        | 1         | 4              |
| TCGA-4N-A93T | 0                           | 8                 | 1        | 1         | 1        | 1         | 4              |
| TCGA-CM-5862 | 1                           | 153               | 1        | 1         | 1        | 0         | 3              |
| TCGA-AZ-6598 | 1                           | 1503              | 1        | 1         | 1        | 0         | 3              |
| TCGA-A6-A565 | 1                           | 494               | 1        | 1         | 1        | 0         | 3              |
| TCGA-5M-AAT6 | 1                           | 290               | 1        | 1         | 1        | 0         | 3              |
| TCGA-DM-A28C | 1                           | 2475              | 1        | 1         | 1        | 0         | 3              |
| TCGA-DM-A1DB | 1                           | 1348              | 1        | 1         | 1        | 0         | 3              |
| TCGA-DM-A28F | 1                           | 1094              | 1        | 1         | 1        | 0         | 3              |
| TCGA-DM-A1D9 | 0                           | 3920              | 1        | 1         | 1        | 0         | 3              |
| TCGA-DM-A1D0 | 0                           | 3625              | 1        | 1         | 1        | 0         | 3              |
| TCGA-5M-AATE | 0                           | 1200              | 1        | 1         | 1        | 0         | 3              |
| TCGA-G4-6317 | 0                           | 894               | 1        | 1         | 1        | 0         | 3              |
| TCGA-G4-6320 | 0                           | 678               | 1        | 1         | 1        | 0         | 3              |
| TCGA-CK-4947 | 0                           | 534               | 1        | 1         | 1        | 0         | 3              |
| TCGA-D5-5537 | 0                           | 456               | 1        | 1         | 1        | 0         | 3              |
| TCGA-AU-3779 | 0                           | 441               | 1        | 1         | 1        | 0         | 3              |
| TCGA-QL-A97D | 0                           | 295               | 1        | 1         | 1        | 0         | 3              |
| TCGA-D5-6529 | 0                           | 260               | 1        | 1         | 1        | 0         | 3              |
| TCGA-CM-6172 | 0                           | 212               | 1        | 1         | 1        | 0         | 3              |
| TCGA-AY-A8YK | 0                           | 209               | 1        | 1         | 1        | 0         | 3              |
| TCGA-G4-6323 | 0                           | 201               | 1        | 1         | 1        | 0         | 3              |
| TCGA-A6-6137 | 0                           | 195               | 1        | 1         | 1        | 0         | 3              |
| TCGA-A6-6650 | 0                           | 173               | 1        | 1         | 1        | 0         | 3              |
| TCGA-NH-A6GB | 0                           | 170               | 1        | 1         | 1        | 0         | 3              |
| TCGA-NH-A8F7 | 0                           | 158               | 1        | 1         | 1        | 0         | 3              |
| TCGA-A6-6141 | 0                           | 130               | 1        | 1         | 1        | 0         | 3              |
| TCGA-AD-6888 | 0                           | 128               | 1        | 1         | 1        | 0         | 3              |

|              |   |      |   |   |   |   |   |
|--------------|---|------|---|---|---|---|---|
| TCGA-A6-6140 | 0 | 125  | 1 | 1 | 1 | 0 | 3 |
| TCGA-D5-6532 | 0 | 107  | 1 | 1 | 1 | 0 | 3 |
| TCGA-D5-6535 | 0 | 10   | 1 | 1 | 1 | 0 | 3 |
| TCGA-T9-A92H | 0 | 0    | 1 | 1 | 1 | 0 | 3 |
| TCGA-F4-6461 | 0 | 0    | 1 | 1 | 1 | 0 | 3 |
| TCGA-AA-3511 | 0 | 0    | 1 | 1 | 1 | 0 | 3 |
| TCGA-G4-6298 | 1 | 715  | 0 | 1 | 1 | 1 | 3 |
| TCGA-AZ-6605 | 1 | 159  | 0 | 1 | 1 | 1 | 3 |
| TCGA-AZ-6601 | 1 | 3042 | 0 | 1 | 1 | 1 | 3 |
| TCGA-AZ-5403 | 1 | 1910 | 0 | 1 | 1 | 1 | 3 |
| TCGA-AZ-4616 | 1 | 156  | 0 | 1 | 1 | 1 | 3 |
| TCGA-AZ-4323 | 1 | 43   | 0 | 1 | 1 | 1 | 3 |
| TCGA-A6-4105 | 1 | 442  | 1 | 0 | 1 | 1 | 3 |
| TCGA-DM-A28A | 1 | 805  | 1 | 0 | 1 | 1 | 3 |
| TCGA-DM-A0XD | 1 | 743  | 0 | 1 | 1 | 1 | 3 |
| TCGA-DM-A280 | 1 | 236  | 0 | 1 | 1 | 1 | 3 |
| TCGA-DM-A28E | 0 | 3530 | 0 | 1 | 1 | 1 | 3 |
| TCGA-G4-6303 | 0 | 1882 | 0 | 1 | 1 | 1 | 3 |
| TCGA-G4-6628 | 0 | 1606 | 0 | 1 | 1 | 1 | 3 |
| TCGA-G4-6310 | 0 | 1205 | 0 | 1 | 1 | 1 | 3 |
| TCGA-G4-6586 | 0 | 741  | 0 | 1 | 1 | 1 | 3 |
| TCGA-CM-4751 | 0 | 607  | 0 | 1 | 1 | 1 | 3 |
| TCGA-G4-6321 | 0 | 572  | 0 | 1 | 1 | 1 | 3 |
| TCGA-A6-2675 | 0 | 515  | 0 | 1 | 1 | 1 | 3 |
| TCGA-CM-6164 | 0 | 487  | 0 | 1 | 1 | 1 | 3 |
| TCGA-CM-5861 | 0 | 335  | 0 | 1 | 1 | 1 | 3 |
| TCGA-A6-5661 | 0 | 306  | 0 | 1 | 1 | 1 | 3 |
| TCGA-CM-5863 | 0 | 304  | 0 | 1 | 1 | 1 | 3 |
| TCGA-CM-5860 | 0 | 304  | 0 | 1 | 1 | 1 | 3 |
| TCGA-A6-5665 | 0 | 286  | 0 | 1 | 1 | 1 | 3 |
| TCGA-D5-6530 | 0 | 271  | 1 | 1 | 0 | 1 | 3 |
| TCGA-A6-6648 | 0 | 253  | 1 | 1 | 0 | 1 | 3 |
| TCGA-NH-A6GA | 0 | 182  | 1 | 0 | 1 | 1 | 3 |
| TCGA-A6-6654 | 0 | 178  | 0 | 1 | 1 | 1 | 3 |
| TCGA-A6-6782 | 0 | 164  | 0 | 1 | 1 | 1 | 3 |
| TCGA-NH-A8F7 | 0 | 158  | 1 | 0 | 1 | 1 | 3 |
| TCGA-3L-AA1B | 0 | 154  | 1 | 0 | 1 | 1 | 3 |
| TCGA-CM-6677 | 0 | 153  | 0 | 1 | 1 | 1 | 3 |
| TCGA-CM-6676 | 0 | 153  | 0 | 1 | 1 | 1 | 3 |
| TCGA-CM-6674 | 0 | 150  | 0 | 1 | 1 | 1 | 3 |
| TCGA-D5-6929 | 0 | 146  | 1 | 0 | 1 | 1 | 3 |
| TCGA-CM-6679 | 0 | 122  | 0 | 1 | 1 | 1 | 3 |
| TCGA-CM-6678 | 0 | 122  | 0 | 1 | 1 | 1 | 3 |
| TCGA-D5-6920 | 0 | 112  | 1 | 0 | 1 | 1 | 3 |
| TCGA-D5-6924 | 0 | 89   | 1 | 0 | 1 | 1 | 3 |
| TCGA-CK-6747 | 0 | 89   | 1 | 0 | 1 | 1 | 3 |
| TCGA-F4-6703 | 0 | 56   | 0 | 1 | 1 | 1 | 3 |
| TCGA-F4-6704 | 0 | 47   | 0 | 1 | 1 | 1 | 3 |
| TCGA-F4-6855 | 0 | 42   | 0 | 1 | 1 | 1 | 3 |
| TCGA-F4-6809 | 0 | 39   | 0 | 1 | 1 | 1 | 3 |
| TCGA-AD-6901 | 0 | 31   | 0 | 1 | 1 | 1 | 3 |
| TCGA-AA-3489 | 0 | 31   | 0 | 1 | 1 | 1 | 3 |
| TCGA-D5-5539 | 0 | 30   | 0 | 1 | 1 | 1 | 3 |
| TCGA-D5-6932 | 0 | 19   | 0 | 1 | 1 | 1 | 3 |
| TCGA-F4-6854 | 0 | 16   | 1 | 0 | 1 | 1 | 3 |
| TCGA-AD-6963 | 0 | 3    | 0 | 1 | 1 | 1 | 3 |
| TCGA-AD-6548 | 0 | 3    | 0 | 1 | 1 | 1 | 3 |
| TCGA-AD-5900 | 0 | 2    | 0 | 1 | 1 | 1 | 3 |
| TCGA-F4-6570 | 0 | 0    | 0 | 1 | 1 | 1 | 3 |
| TCGA-F4-6569 | 0 | 0    | 0 | 1 | 1 | 1 | 3 |
| TCGA-F4-6460 | 0 | 0    | 1 | 0 | 1 | 1 | 3 |
| TCGA-F4-6459 | 0 | 0    | 0 | 1 | 1 | 1 | 3 |
| TCGA-A6-A566 | 1 | 758  | 0 | 1 | 1 | 0 | 2 |
| TCGA-DM-A1DA | 1 | 228  | 1 | 0 | 1 | 0 | 2 |
| TCGA-DM-A1HB | 0 | 3786 | 0 | 1 | 1 | 0 | 2 |
| TCGA-DM-A0X9 | 0 | 3429 | 1 | 0 | 1 | 0 | 2 |
| TCGA-DM-A28H | 0 | 3423 | 1 | 0 | 1 | 0 | 2 |
| TCGA-CK-4948 | 0 | 3116 | 0 | 1 | 1 | 0 | 2 |
| TCGA-DM-A28K | 0 | 2835 | 1 | 0 | 1 | 0 | 2 |
| TCGA-G4-6299 | 0 | 2077 | 0 | 1 | 1 | 0 | 2 |
| TCGA-WS-AB45 | 0 | 2038 | 1 | 0 | 1 | 0 | 2 |
| TCGA-A6-A56B | 0 | 1595 | 1 | 0 | 1 | 0 | 2 |
| TCGA-G4-6307 | 0 | 1485 | 0 | 1 | 1 | 0 | 2 |
| TCGA-CK-5912 | 0 | 1466 | 1 | 1 | 0 | 0 | 2 |
| TCGA-CK-4950 | 0 | 1227 | 1 | 1 | 0 | 0 | 2 |
| TCGA-G4-6311 | 0 | 1112 | 0 | 1 | 1 | 0 | 2 |
| TCGA-G4-6315 | 0 | 937  | 0 | 1 | 1 | 0 | 2 |
| TCGA-RU-A8FL | 0 | 921  | 1 | 0 | 1 | 0 | 2 |
| TCGA-G4-6317 | 0 | 894  | 0 | 1 | 1 | 0 | 2 |
| TCGA-QG-A5YV | 0 | 821  | 1 | 0 | 1 | 0 | 2 |
| TCGA-G4-6588 | 0 | 644  | 0 | 1 | 1 | 0 | 2 |

|              |   |      |   |   |   |   |   |
|--------------|---|------|---|---|---|---|---|
| TCGA-A6-5656 | 0 | 462  | 0 | 1 | 1 | 0 | 2 |
| TCGA-A6-5656 | 0 | 462  | 0 | 1 | 1 | 0 | 2 |
| TCGA-QG-A5Z2 | 0 | 449  | 1 | 0 | 1 | 0 | 2 |
| TCGA-QG-A5YW | 0 | 399  | 1 | 0 | 1 | 0 | 2 |
| TCGA-A6-5660 | 0 | 342  | 0 | 1 | 1 | 0 | 2 |
| TCGA-CM-5349 | 0 | 335  | 0 | 1 | 1 | 0 | 2 |
| TCGA-CM-5868 | 0 | 304  | 0 | 1 | 1 | 0 | 2 |
| TCGA-D5-6536 | 0 | 287  | 1 | 1 | 0 | 0 | 2 |
| TCGA-CM-6169 | 0 | 243  | 0 | 1 | 1 | 0 | 2 |
| TCGA-CM-6170 | 0 | 242  | 0 | 1 | 1 | 0 | 2 |
| TCGA-D5-6534 | 0 | 241  | 0 | 1 | 1 | 0 | 2 |
| TCGA-AY-A71X | 0 | 235  | 1 | 0 | 1 | 0 | 2 |
| TCGA-AY-5543 | 0 | 230  | 1 | 1 | 0 | 0 | 2 |
| TCGA-CM-6165 | 0 | 212  | 0 | 1 | 1 | 0 | 2 |
| TCGA-CM-6162 | 0 | 212  | 0 | 1 | 1 | 0 | 2 |
| TCGA-CM-6171 | 0 | 182  | 1 | 1 | 0 | 0 | 2 |
| TCGA-A6-6650 | 0 | 173  | 1 | 0 | 1 | 0 | 2 |
| TCGA-A6-6650 | 0 | 173  | 1 | 0 | 1 | 0 | 2 |
| TCGA-AY-A69D | 0 | 168  | 1 | 0 | 1 | 0 | 2 |
| TCGA-NH-A8F8 | 0 | 167  | 0 | 1 | 1 | 0 | 2 |
| TCGA-4T-AA8H | 0 | 160  | 1 | 0 | 1 | 0 | 2 |
| TCGA-AY-A54L | 0 | 158  | 1 | 0 | 1 | 0 | 2 |
| TCGA-A6-6781 | 0 | 158  | 1 | 0 | 1 | 0 | 2 |
| TCGA-A6-6781 | 0 | 158  | 0 | 1 | 1 | 0 | 2 |
| TCGA-A6-6781 | 0 | 158  | 0 | 1 | 1 | 0 | 2 |
| TCGA-NH-A50V | 0 | 154  | 1 | 0 | 1 | 0 | 2 |
| TCGA-D5-6539 | 0 | 145  | 1 | 1 | 0 | 0 | 2 |
| TCGA-A6-6652 | 0 | 135  | 1 | 0 | 1 | 0 | 2 |
| TCGA-A6-6142 | 0 | 134  | 0 | 1 | 1 | 0 | 2 |
| TCGA-CM-6167 | 0 | 122  | 0 | 1 | 1 | 0 | 2 |
| TCGA-A6-A5ZU | 0 | 117  | 1 | 0 | 1 | 0 | 2 |
| TCGA-D5-6541 | 0 | 108  | 0 | 1 | 1 | 0 | 2 |
| TCGA-CM-6163 | 0 | 90   | 0 | 1 | 1 | 0 | 2 |
| TCGA-A6-6780 | 0 | 87   | 0 | 1 | 1 | 0 | 2 |
| TCGA-NH-A5IV | 0 | 85   | 0 | 1 | 1 | 0 | 2 |
| TCGA-AD-6899 | 0 | 48   | 1 | 0 | 1 | 0 | 2 |
| TCGA-AA-3660 | 0 | 31   | 1 | 1 | 0 | 0 | 2 |
| TCGA-AA-3697 | 0 | 30   | 1 | 1 | 0 | 0 | 2 |
| TCGA-AD-6964 | 0 | 23   | 0 | 1 | 1 | 0 | 2 |
| TCGA-D5-6928 | 0 | 20   | 0 | 1 | 1 | 0 | 2 |
| TCGA-AD-A5EK | 0 | 13   | 1 | 0 | 1 | 0 | 2 |
| TCGA-CA-5797 | 0 | 8    | 0 | 1 | 1 | 0 | 2 |
| TCGA-AY-6196 | 0 | 6    | 0 | 1 | 1 | 0 | 2 |
| TCGA-CA-5255 | 0 | 2    | 0 | 1 | 1 | 0 | 2 |
| TCGA-F4-6463 | 0 | 0    | 0 | 1 | 1 | 0 | 2 |
| TCGA-AA-3712 | 0 | 0    | 0 | 1 | 1 | 0 | 2 |
| TCGA-AA-3662 | 0 | 0    | 1 | 1 | 0 | 0 | 2 |
| TCGA-CK-6746 | 0 | -2   | 1 | 1 | 0 | 0 | 2 |
| TCGA-AZ-6607 | 1 | 97   | 0 | 1 | 0 | 1 | 2 |
| TCGA-DM-A285 | 1 | 186  | 0 | 0 | 1 | 1 | 2 |
| TCGA-DM-A1HA | 0 | 3924 | 0 | 1 | 0 | 1 | 2 |
| TCGA-CK-6751 | 0 | 3136 | 0 | 0 | 1 | 1 | 2 |
| TCGA-DM-A28M | 0 | 2775 | 0 | 0 | 1 | 1 | 2 |
| TCGA-G4-6627 | 0 | 1434 | 0 | 1 | 0 | 1 | 2 |
| TCGA-G4-6309 | 0 | 1386 | 0 | 0 | 1 | 1 | 2 |
| TCGA-G4-6302 | 0 | 1310 | 0 | 0 | 1 | 1 | 2 |
| TCGA-G4-6314 | 0 | 1031 | 0 | 0 | 1 | 1 | 2 |
| TCGA-CM-6166 | 0 | 424  | 0 | 0 | 1 | 1 | 2 |
| TCGA-A6-5657 | 0 | 367  | 0 | 0 | 1 | 1 | 2 |
| TCGA-A6-5664 | 0 | 362  | 0 | 0 | 1 | 1 | 2 |
| TCGA-CM-5344 | 0 | 304  | 0 | 0 | 1 | 1 | 2 |
| TCGA-A6-6651 | 0 | 249  | 0 | 0 | 1 | 1 | 2 |
| TCGA-D5-6922 | 0 | 134  | 0 | 0 | 1 | 1 | 2 |
| TCGA-D5-6927 | 0 | 67   | 0 | 0 | 1 | 1 | 2 |
| TCGA-CK-6748 | 0 | 61   | 0 | 0 | 1 | 1 | 2 |
| TCGA-D5-6930 | 0 | 46   | 0 | 0 | 1 | 1 | 2 |
| TCGA-D5-6898 | 0 | 45   | 0 | 0 | 1 | 1 | 2 |
| TCGA-D5-6931 | 0 | 43   | 1 | 0 | 0 | 1 | 2 |
| TCGA-D5-6923 | 0 | 43   | 0 | 0 | 1 | 1 | 2 |
| TCGA-D5-7000 | 0 | 41   | 0 | 0 | 1 | 1 | 2 |
| TCGA-D5-6533 | 0 | 40   | 0 | 1 | 0 | 1 | 2 |
| TCGA-AD-6890 | 0 | 24   | 0 | 0 | 1 | 1 | 2 |
| TCGA-AD-6895 | 0 | 22   | 0 | 0 | 1 | 1 | 2 |
| TCGA-F4-6807 | 0 | 16   | 0 | 0 | 1 | 1 | 2 |
| TCGA-F4-6805 | 0 | 16   | 0 | 0 | 1 | 1 | 2 |
| TCGA-AD-6965 | 0 | 6    | 0 | 0 | 1 | 1 | 2 |
| TCGA-CA-5254 | 0 | 5    | 0 | 0 | 1 | 1 | 2 |
| TCGA-CA-6718 | 0 | 3    | 0 | 0 | 1 | 1 | 2 |
| TCGA-NH-A50U | 1 | 334  | 0 | 0 | 1 | 0 | 1 |
| TCGA-CK-5916 | 1 | 643  | 0 | 1 | 0 | 0 | 1 |
| TCGA-A6-A567 | 1 | 1881 | 0 | 0 | 1 | 0 | 1 |

|              |   |      |   |   |   |   |   |
|--------------|---|------|---|---|---|---|---|
| TCGA-5M-AAT4 | 1 | 49   | 0 | 0 | 1 | 0 | 1 |
| TCGA-G4-6293 | 0 | 3203 | 1 | 0 | 0 | 0 | 1 |
| TCGA-G4-6297 | 0 | 2289 | 0 | 1 | 0 | 0 | 1 |
| TCGA-G4-6304 | 0 | 1631 | 0 | 0 | 1 | 0 | 1 |
| TCGA-AZ-5407 | 0 | 1395 | 1 | 0 | 0 | 0 | 1 |
| TCGA-CK-5914 | 0 | 669  | 0 | 0 | 1 | 0 | 1 |
| TCGA-G4-6322 | 0 | 547  | 1 | 0 | 0 | 0 | 1 |
| TCGA-QG-A5YX | 0 | 526  | 0 | 0 | 1 | 0 | 1 |
| TCGA-CK-4952 | 0 | 475  | 1 | 0 | 0 | 0 | 1 |
| TCGA-A6-5656 | 0 | 462  | 0 | 0 | 1 | 0 | 1 |
| TCGA-CM-5348 | 0 | 393  | 0 | 1 | 0 | 0 | 1 |
| TCGA-A6-5667 | 0 | 320  | 0 | 0 | 1 | 0 | 1 |
| TCGA-A6-5662 | 0 | 297  | 0 | 1 | 0 | 0 | 1 |
| TCGA-A6-5659 | 0 | 286  | 0 | 0 | 1 | 0 | 1 |
| TCGA-D5-6538 | 0 | 246  | 1 | 0 | 0 | 0 | 1 |
| TCGA-A6-5666 | 0 | 244  | 1 | 0 | 0 | 0 | 1 |
| TCGA-D5-5538 | 0 | 204  | 0 | 1 | 0 | 0 | 1 |
| TCGA-QG-A5Z1 | 0 | 202  | 0 | 0 | 1 | 0 | 1 |
| TCGA-D5-5541 | 0 | 202  | 0 | 1 | 0 | 0 | 1 |
| TCGA-CM-4743 | 0 | 184  | 0 | 1 | 0 | 0 | 1 |
| TCGA-CM-6168 | 0 | 181  | 0 | 0 | 1 | 0 | 1 |
| TCGA-AY-6386 | 0 | 169  | 1 | 0 | 0 | 0 | 1 |
| TCGA-NH-A50T | 0 | 125  | 0 | 0 | 1 | 0 | 1 |
| TCGA-D5-6926 | 0 | 95   | 0 | 0 | 1 | 0 | 1 |
| TCGA-A6-6653 | 0 | 91   | 0 | 0 | 1 | 0 | 1 |
| TCGA-A6-6780 | 0 | 87   | 1 | 0 | 0 | 0 | 1 |
| TCGA-CM-5864 | 0 | 61   | 1 | 0 | 0 | 0 | 1 |
| TCGA-AA-3663 | 0 | 31   | 1 | 0 | 0 | 0 | 1 |
| TCGA-AA-3713 | 0 | 30   | 0 | 1 | 0 | 0 | 1 |
| TCGA-F4-6856 | 0 | 20   | 0 | 0 | 1 | 0 | 1 |
| TCGA-CA-5796 | 0 | 12   | 1 | 0 | 0 | 0 | 1 |
| TCGA-CA-6715 | 0 | 2    | 1 | 0 | 0 | 0 | 1 |
| TCGA-CK-5915 | 0 | 0    | 1 | 0 | 0 | 0 | 1 |
| TCGA-AD-A5EJ | 0 | 0    | 0 | 0 | 1 | 0 | 1 |
| TCGA-AA-3655 | 0 | 0    | 1 | 0 | 0 | 0 | 1 |
| TCGA-A6-5665 | 0 | 286  | 0 | 0 | 0 | 1 | 1 |
| TCGA-CM-6675 | 0 | 153  | 0 | 0 | 0 | 1 | 1 |
| TCGA-CA-6719 | 0 | 41   | 0 | 0 | 0 | 1 | 1 |
| TCGA-CA-6717 | 0 | 10   | 0 | 0 | 0 | 1 | 1 |
| TCGA-CA-6716 | 0 | 8    | 0 | 0 | 0 | 1 | 1 |
| TCGA-AD-6889 | 0 | 1720 | 0 | 0 | 0 | 0 | 0 |
| TCGA-CK-5913 | 0 | 853  | 0 | 0 | 0 | 0 | 0 |
| TCGA-A6-5661 | 0 | 306  | 0 | 0 | 0 | 0 | 0 |
| TCGA-CM-6161 | 0 | 212  | 0 | 0 | 0 | 0 | 0 |
| TCGA-AU-6004 | 0 | 203  | 0 | 0 | 0 | 0 | 0 |
| TCGA-D5-5540 | 0 | 198  | 0 | 0 | 0 | 0 | 0 |
| TCGA-D5-6540 | 0 | 186  | 0 | 0 | 0 | 0 | 0 |
| TCGA-D5-6537 | 0 | 137  | 0 | 0 | 0 | 0 | 0 |
| TCGA-AY-6197 | 0 | 113  | 0 | 0 | 0 | 0 | 0 |
| TCGA-A6-6780 | 0 | 87   | 0 | 0 | 0 | 0 | 0 |
| TCGA-AM-5821 | 0 | 28   | 0 | 0 | 0 | 0 | 0 |
| TCGA-D5-6531 | 0 | 17   | 0 | 0 | 0 | 0 | 0 |
| TCGA-AM-5820 | 0 | 14   | 0 | 0 | 0 | 0 | 0 |

Supplemental table s3. Gene targets of four miRNAs

| miR-148a | miR-26a-2 | miR-130a | miR-103-1 |
|----------|-----------|----------|-----------|
| ATP6AP2  | POLR3G    | SLAIN1   | FGFRL1    |
| MEOX2    | CHORDC1   | MDM4     | RNF38     |
| GLRX5    | THAP2     | KDM2A    | PPP6R2    |
| C5orf30  | STRADB    | KLF7     | TRIAP1    |
| SNN      | ARPP19    | PAN3     | MED26     |
| GADD45A  | MTX2      | ENPP5    | GJE1      |
| ARL8B    | ZDHHC6    | FBXO28   | NPAS3     |
| NPTN     | ART3      | MYBL1    | ANO3      |
| NPEPL1   | MAB21L1   | ACVR1    | PRKAG3    |
| MITF     | BID       | CPEB1    | ARIH2     |
| CLCN6    | SRP19     | CHST1    | NEK10     |
| CDK5R1   | PALM3     | RTCA     | ARMC1     |
| TMEM54   | FAM98A    | SYBU     | FAM103A1  |
| C18orf25 | SERP1     | IRF1     | AGFG1     |
| SOS2     | CREBZF    | RPS6KA5  | TFRC      |
| HLA-DQB2 | GMDS      | MAF      | NEIL1     |
| S1PR1    | HMGA1     | DYNLL2   | CACNA2D1  |
| QKI      | EZH2      | SBF2     | GPRIN3    |
| INO80    | PMAIP1    | RNF38    | SPATS2L   |
| RTN4     | HMGA2     | TSHZ1    | RPSAP58   |
| CCT6A    | UBE2W     | EREG     | C5orf60   |
| B4GALT5  | MTFMT     | RAI2     | TPD52     |
| TMED7    | TAF13     | NFIA     | C7orf55   |

|          |          |              |               |
|----------|----------|--------------|---------------|
| DCP2     | ARPC3    | SKIDA1       | KIF2B         |
| MXD1     | GPR52    | SRSF2        | TMEM47        |
| RAB34    | TEX26    | ZBTB18       | CKMT1A        |
| ITGA9    | SLC38A2  | IGF1         | AGO4          |
| PRNP     | REEP3    | WDR20        | GPC6          |
| SZRD1    | BLOC1S2  | FICD         | DLEU7         |
| HOMER1   | BOD1L2   | C7orf60      | SNCG          |
| DDX6     | FRAT2    | HABP4        | WDR61         |
| MMD      | NAP1L5   | FRZB         | ZHX1          |
| MRAS     | TOB1     | MMGT1        | GREM2         |
| BARHL2   | FAM98B   | SH3D19       | CPA6          |
| OTX2     | NUS1     | GJA1         | PTCHD3        |
| ZDHHC7   | LOXL2    | VPS37A       | OR52E8        |
| PNRC2    | RDH14    | HPRT1        | AP006621.5    |
| CCDC144A | ZBTB37   | TMEM55A      | SH2D4B        |
| PIGA     | KLHL42   | PPARG        | CST3          |
| MAFB     | SLC25A16 | CALM2        | RP11-664D7.4  |
| ST8SIA3  | UBE2G1   | CCDC126      | LCN15         |
| WDR47    | COMMD8   | DDX6         | OR4M1         |
| STX3     | PRKCD    | ZMAT3        | DUS1L         |
| RNF219   | MSMO1    | CD69         | PPP2R3C       |
| WDR20    | CHAC1    | ESR1         | PNPLA2        |
| SNX3     | ARPP21   | RAP2C        | CDC14A        |
| PTPRA    | RHOQ     | PMEP A1      | MIF4GD        |
| TNRC6A   | ACBD5    | TSC1         | TWF1          |
| AGO4     | ZDHHC20  | BTG1         | KRTAP20-2     |
| C15orf27 | OSBPL11  | KCNJ10       | ZNRF2         |
| UBAP2L   | RHOU     | PIGA         | UNC80         |
| LYSMD2   | ADM      | TES          | GFOD1         |
| EOGT     | IPPK     | C4orf36      | PTEN          |
| MMP15    | WBSCR16  | PURG         | PRKCE         |
| ARRDC3   | GPALPP1  | TROVE2       | AGO1          |
| CTSA     | SMAD1    | LDLR         | PATE4         |
| USP48    | TMEM106B | ULK2         | AC068987.1    |
| CDC14A   | RGS4     | RRAGD        | HTR2A         |
| ARFIP1   | MARCH11  | CBFB         | ERLIN1        |
| MTMR9    | STRBP    | TGFBR2       | B3GALT4       |
| KAT7     | TTC13    | HS3ST5       | HELLS         |
| ZNF274   | SKP2     | CHMP3        | NUDCD2        |
| PPP1R10  | LRRC2    | HBP1         | RPL34         |
| BAI3     | CCDC28A  | ZNF217       | NRIP1         |
| ABCB7    | ANKS1B   | RNF103-CHMP3 | CDKN1C        |
| MDM4     | SNN      | NPNT         | BST1          |
| SPRYD7   | CDC6     | HOXB1        | PDCD10        |
| PPP6R1   | TM4SF18  | ZNF3         | ARHGAP17      |
| C1GALT1  | ZNF410   | KALRN        | LDOC1         |
| CCDC6    | GNPNAT1  | MIER1        | SNURF         |
| CABP7    | DDX52    | FOSL1        | ATP13A4       |
| PHAX     | BOD1     | MID1IP1      | EIF5          |
| SNX27    | ZFC3H1   | CPEB3        | AXIN2         |
| SOS1     | PTEN     | ACBD5        | LAPTM4A       |
| SMIM12   | NABP1    | ARHGAP12     | PTPLB         |
| C7orf60  | FAM214B  | C9orf69      | PPP6C         |
| NRAS     | ARMCX2   | ST18         | TK2           |
| FBXO28   | STK39    | CDK19        | RDH11         |
| NR2C2AP  | CDK8     | SPG20        | RRAGC         |
| SESTD1   | MNX1     | UBC          | KIAA0247      |
| FEZ2     | RNF141   | MEOX2        | VAPB          |
| NPTX1    | ACSL3    | TRERF1       | AC007461.1    |
| NCKIPSD  | EPC1     | COX8C        | CD80          |
| DDAH1    | ADAM9    | SLC2A4RG     | TMEM221       |
| CDK19    | RCN2     | FAM175B      | NAA60         |
| ELAVL4   | ASP N    | FNDC4        | RP11-826N14.2 |
| KLF6     | DYRK1A   | PTEN         | JAKMIP2       |
| ERRF11   | MINPP1   | KCNA4        | AMMECR1       |
| VMP1     | ATF2     | MTMR6        | EPHA3         |
| FXR1     | SYT10    | DSEL         | SNX12         |
| SMS      | ACTR3    | SLC6A6       | RET           |
| BICC1    | DCDC2    | C5orf30      | KRTAP20-1     |
| EIF4E3   | GBP3     | LONRF1       | PHF19         |
| MARCH3   | RCN1     | SNAP25       | CDK5R1        |
| MTF1     | SHC4     | CPEB2        | SNX3          |
| KLF5     | EIF4G2   | KLF3         | RPUSD1        |
| PNPLA6   | HOXA5    | HIVEP2       | SH3BP4        |
| C3orf58  | CKS2     | ATP2B2       | C14orf105     |
| TGFA     | MTM1     | QKI          | RP11-1026M7.2 |
| UCP3     | PFDN4    | EPC2         | SMPD1         |

Supplemental table s4. GO Term of Biological Process



| Term                                                                                                    | Count | p value | Genes                                                                                                                                                                                                                                                                                                                                                                                                                                                          |
|---------------------------------------------------------------------------------------------------------|-------|---------|----------------------------------------------------------------------------------------------------------------------------------------------------------------------------------------------------------------------------------------------------------------------------------------------------------------------------------------------------------------------------------------------------------------------------------------------------------------|
| GO:0045449~regulation of transcription                                                                  | 66    | 0.007   | SLC2A4RG, EZH2, PPARG, MITF, RHOQ, CBFB, ZBTB37, EPC1, RNF141, SIPR1, MIER1, MED26, FOSL1, ZHX1, OTX2, BARHL2, ESR1, CDK8, HMGA2, MXD1, TRERF1, HMGA1, ZNF3, NRIP1, TAF13, MTF1, KDM2A, EREG, CD80, BTG1, UBC, MNX1, ST18, MDM4, ACVR1, ZNF274, TSHZ1, MYBL1, ATF2, NPAS3, BLOC1S2, HOXA5, HBPI, HELLS, KLF5, POLR3G, MAF, KLF6, KLF7, CREBZF, MAFB, IGF1, SMAD1, RPS6KA5, CDKN1C, HOXB1, ZNF217, PHF19, MEOX2, PNRC2, IRF1, HIVEP2, HABP4, NFIA, KLF3, ZNF410 |
| GO:0006350~transcription                                                                                | 55    | 0.008   | SLC2A4RG, EZH2, PPARG, MITF, CBFB, ZBTB37, EPC1, MIER1, MED26, FOSL1, ZHX1, BARHL2, CDK8, ESR1, HMGA2, MXD1, TRERF1, HMGA1, ZNF3, NRIP1, TAF13, MTF1, EREG, KDM2A, MNX1, ST18, ZNF274, TSHZ1, MYBL1, RRAGC, ATF2, TROVE2, NPAS3, HOXA5, HBPI, HELLS, POLR3G, MAF, KLF5, KLF6, KLF7, CREBZF, MAFB, PPP1R10, SMAD1, HOXB1, ZNF217, PHF19, PNRC2, IRF1, HIVEP2, HABP4, NFIA, ZNF410, KLF3                                                                         |
| GO:0006355~regulation of transcription, DNA-dependent                                                   | 47    | 0.013   | ZNF274, SLC2A4RG, TSHZ1, MITF, PPARG, EZH2, RHOQ, MYBL1, CBFB, ATF2, EPC1, RNF141, NPAS3, SIPR1, HOXA5, MED26, FOSL1, HELLS, POLR3G, MAF, KLF5, KLF6, KLF7, CREBZF, MAFB, ZHX1, BARHL2, OTX2, ESR1, IGF1, SMAD1, HMGA2, HMGA1, TRERF1, ZNF3, NRIP1, RPS6KA5, CDKN1C, HOXB1, MTF1, MEOX2, MNX1, IRF1, HIVEP2, MDM4, ST18, NFIA                                                                                                                                  |
| GO:0051252~regulation of RNA metabolic process                                                          | 47    | 0.018   | ZNF274, SLC2A4RG, TSHZ1, MITF, PPARG, EZH2, RHOQ, MYBL1, CBFB, ATF2, EPC1, RNF141, NPAS3, SIPR1, HOXA5, MED26, FOSL1, HELLS, POLR3G, MAF, KLF5, KLF6, KLF7, CREBZF, MAFB, ZHX1, BARHL2, OTX2, ESR1, IGF1, SMAD1, HMGA2, HMGA1, TRERF1, ZNF3, NRIP1, RPS6KA5, CDKN1C, HOXB1, MTF1, MEOX2, MNX1, IRF1, HIVEP2, MDM4, ST18, NFIA                                                                                                                                  |
| GO:0007242~intracellular signaling cascade                                                              | 36    | 0.011   | PRKAG3, MRAS, RHOQ, RHOU, RRAGC, TMED7, TRIAP1, SIPR1, SOS1, SOS2, TGFA, DDAH1, SHC4, ADAM9, RET, RAP2C, ESR1, DCDC2, IGF1, SMAD1, STRADB, PRKCE, HOMER1, PRKCD, NRIP1, RPS6KA5, NRAS, CD80, ADM, RGS4, RAB34, CKS2, ARL8B, PMP2A, KALRN, HTR2A                                                                                                                                                                                                                |
| GO:0010604~positive regulation of macromolecule metabolic process                                       | 30    | 0.001   | MITF, PPARG, RHOQ, GJA1, CBFB, EPC1, SIPR1, BLOC1S2, FOSL1, ADAM9, MAF, KLF5, KLF6, KLF7, MAFB, BARHL2, ESR1, IGF1, SMAD1, HMGA1, TRERF1, NRIP1, HOXB1, MTF1, EREG, CD80, UBC, IRF1, SH3D19, ACVR1                                                                                                                                                                                                                                                             |
| GO:0006793~phosphorus metabolic process                                                                 | 30    | 0.009   | CDK19, PPP6C, CDK5R1, CDC14A, PTEN, MTM1, TGFA, STK39, MTMR9, MTMR6, ADAM9, MINPP1, RET, TWF1, PAN3, TGFBR2, PTPRA, CDK8, NEK10, STRADB, PRKCE, PRKCD, EPHA3, RPS6KA5, SBF2, ULK2, DYRK1A, IPPK, KALRN, ACVR1                                                                                                                                                                                                                                                  |
| GO:0006796~phosphate metabolic process                                                                  | 30    | 0.009   | CDK19, PPP6C, CDK5R1, CDC14A, PTEN, MTM1, TGFA, STK39, MTMR9, MTMR6, ADAM9, MINPP1, RET, TWF1, PAN3, TGFBR2, PTPRA, CDK8, NEK10, STRADB, PRKCE, PRKCD, EPHA3, RPS6KA5, SBF2, ULK2, DYRK1A, IPPK, KALRN, ACVR1                                                                                                                                                                                                                                                  |
| GO:0031328~positive regulation of cellular biosynthetic process                                         | 28    | 0.000   | PPARG, MITF, RHOQ, CBFB, EPC1, SIPR1, BLOC1S2, DDAH1, FOSL1, MAF, KLF5, KLF6, KLF7, MAFB, BARHL2, ARPP19, IGF1, SMAD1, HMGA1, TRERF1, NRIP1, HOXB1, EREG, CD80, MTF1, UBC, IRF1, ACVR1                                                                                                                                                                                                                                                                         |
| GO:0009891~positive regulation of biosynthetic process                                                  | 28    | 0.000   | PPARG, MITF, RHOQ, CBFB, EPC1, SIPR1, BLOC1S2, DDAH1, FOSL1, MAF, KLF5, KLF6, KLF7, MAFB, BARHL2, ARPP19, IGF1, SMAD1, HMGA1, TRERF1, NRIP1, HOXB1, EREG, CD80, MTF1, UBC, IRF1, ACVR1                                                                                                                                                                                                                                                                         |
| GO:0051173~positive regulation of nitrogen compound metabolic process                                   | 27    | 0.000   | PPARG, MITF, RHOQ, HPRT1, CBFB, EPC1, SIPR1, BLOC1S2, DDAH1, FOSL1, MAF, KLF5, KLF6, KLF7, MAFB, IGF1, SMAD1, HMGA1, TRERF1, NRIP1, HOXB1, EREG, CD80, MTF1, UBC, IRF1, ACVR1                                                                                                                                                                                                                                                                                  |
| GO:0042127~regulation of cell proliferation                                                             | 27    | 0.003   | PPARG, MITF, FGFRL1, GJA1, PTEN, SIPR1, BLOC1S2, TGFA, AXIN2, FOSL1, KLF5, CDC6, TGFBR2, IGF1, SMAD1, CDKN1C, NRAS, EREG, TSC1, CD80, ADM, BTG1, MDM4, MAB2L1, LDOC1, TOB1, HTR2A                                                                                                                                                                                                                                                                              |
| GO:0010557~positive regulation of macromolecule biosynthetic process                                    | 26    | 0.001   | PPARG, MITF, RHOQ, CBFB, EPC1, SIPR1, BLOC1S2, FOSL1, MAF, KLF5, KLF6, KLF7, MAFB, BARHL2, IGF1, SMAD1, HMGA1, TRERF1, NRIP1, HOXB1, EREG, CD80, MTF1, UBC, IRF1, ACVR1                                                                                                                                                                                                                                                                                        |
| GO:0010628~positive regulation of gene expression                                                       | 25    | 0.000   | KLF5, MAF, KLF6, KLF7, MAFB, MITF, PPARG, ESR1, IGF1, RHOQ, SMAD1, HMGA1, TRERF1, CBFB, NRIP1, EPC1, HOXB1, SIPR1, MTF1, BLOC1S2, CD80, UBC, IRF1, FOSL1, ACVR1                                                                                                                                                                                                                                                                                                |
| GO:0045935~positive regulation of nucleobase, nucleoside, nucleotide and nucleic acid metabolic process | 25    | 0.001   | KLF5, MAF, KLF6, KLF7, MAFB, MITF, PPARG, IGF1, RHOQ, SMAD1, HMGA1, TRERF1, CBFB, NRIP1, EPC1, HOXB1, SIPR1, MTF1, BLOC1S2, CD80, EREG, UBC, IRF1, FOSL1, ACVR1                                                                                                                                                                                                                                                                                                |
| GO:0008219~cell death                                                                                   | 25    | 0.004   | BID, RTN4, PDCD10, VAPB, ZMAT3, MMD, GJA1, PMAIP1, HPRT1, PTEN, PNPLA6, RRAGC, FXR1, TRIAP1, EIF4G2, NRAS, SOS1, SOS2, SPG20, UBC, MDM4, AXIN2, GADD45A, HTR2A, KALRN                                                                                                                                                                                                                                                                                          |
| GO:0016265~death                                                                                        | 25    | 0.005   | BID, RTN4, PDCD10, VAPB, ZMAT3, MMD, GJA1, PMAIP1, HPRT1, PTEN, PNPLA6, RRAGC, FXR1, TRIAP1, EIF4G2, NRAS, SOS1, SOS2, SPG20, UBC, MDM4, AXIN2, GADD45A, HTR2A, KALRN                                                                                                                                                                                                                                                                                          |
| GO:0042981~regulation of apoptosis                                                                      | 25    | 0.016   | BID, RTN4, CDK5R1, ZMAT3, MITF, SKP2, ESR1, IGF1, PMAIP1, STRADB, PRKCE, PTEN, NRAS, TRIAP1, BLOC1S2, BTG1, SOS1, SOS2, UBC, PRNP, FOSL1, HELLS, KALRN, ACVR1, ADAM9                                                                                                                                                                                                                                                                                           |
| GO:0043067~regulation of programmed cell death                                                          | 25    | 0.018   | BID, RTN4, CDK5R1, ZMAT3, MITF, SKP2, ESR1, IGF1, PMAIP1, STRADB, PRKCE, PTEN, NRAS, TRIAP1, BLOC1S2, BTG1, SOS1, SOS2, UBC, PRNP, FOSL1, HELLS, KALRN, ACVR1, ADAM9                                                                                                                                                                                                                                                                                           |
| GO:0010941~regulation of cell death                                                                     | 25    | 0.018   | BID, RTN4, CDK5R1, ZMAT3, MITF, SKP2, ESR1, IGF1, PMAIP1, STRADB, PRKCE, PTEN, NRAS, TRIAP1, BLOC1S2, BTG1, SOS1, SOS2, UBC, PRNP, FOSL1, HELLS, KALRN, ACVR1, ADAM9                                                                                                                                                                                                                                                                                           |
| GO:0045941~positive regulation of transcription                                                         | 24    | 0.000   | KLF5, MAF, KLF6, KLF7, MAFB, PPARG, MITF, IGF1, RHOQ, SMAD1, HMGA1, TRERF1, CBFB, NRIP1, EPC1, HOXB1, SIPR1, CD80, BLOC1S2, MTF1, UBC, IRF1, FOSL1, ACVR1                                                                                                                                                                                                                                                                                                      |
| GO:0006357~regulation of transcription from RNA polymerase II promoter                                  | 23    | 0.018   | MAF, KLF6, KLF7, MAFB, PPARG, MITF, BARHL2, IGF1, RHOQ, SMAD1, CBFB, NRIP1, CDKN1C, EPC1, HOXB1, SIPR1, MTF1, MED26, IRF1, MNX1, MDM4, ST18, FOSL1                                                                                                                                                                                                                                                                                                             |
| GO:0006468~protein amino acid phosphorylation                                                           | 21    | 0.025   | CDK19, RET, TWF1, CDK5R1, PAN3, TGFBR2, PTPRA, CDK8, NEK10, STRADB, PRKCE, PRKCD, EPHA3, RPS6KA5, ULK2, DYRK1A, TGFA, STK39, KALRN, ADAM9, ACVR1                                                                                                                                                                                                                                                                                                               |
| GO:0030182~neuron differentiation                                                                       | 20    | 0.001   | KLF7, RET, CDK5R1, STX3, OTX2, BARHL2, GJA1, HPRT1, PTEN, CDKN1C, ATP2B2, SIPR1, ADM, DYNLL2, ULK2, UBC, MNX1, SNAP25, FEZ2, KALRN                                                                                                                                                                                                                                                                                                                             |
| GO:0045893~positive regulation of transcription, DNA-dependent                                          | 19    | 0.004   | MAF, KLF6, KLF7, MAFB, PPARG, MITF, IGF1, RHOQ, SMAD1, TRERF1, HMGA1, CBFB, NRIP1, EPC1, HOXB1, SIPR1, MTF1, IRF1, FOSL1                                                                                                                                                                                                                                                                                                                                       |
| GO:0051254~positive regulation of RNA metabolic process                                                 | 19    | 0.004   | MAF, KLF6, KLF7, MAFB, PPARG, MITF, IGF1, RHOQ, SMAD1, TRERF1, HMGA1, CBFB, NRIP1, EPC1, HOXB1, SIPR1, MTF1, IRF1, FOSL1                                                                                                                                                                                                                                                                                                                                       |
| GO:0042325~regulation of phosphorylation                                                                | 18    | 0.007   | CDC6, CDK5R1, TGFBR2, IGF1, STRADB, PRKCE, PRKCD, PTEN, CDKN1C, CD80, TSC1, EREG, RGS4, CKS2, TGFA, GADD45A, HTR2A, ADAM9                                                                                                                                                                                                                                                                                                                                      |
| GO:0051174~regulation of phosphorus metabolic process                                                   | 18    | 0.010   | CDC6, CDK5R1, TGFBR2, IGF1, STRADB, PRKCE, PRKCD, PTEN, CDKN1C, CD80, TSC1, EREG, RGS4, CKS2, TGFA, GADD45A, HTR2A, ADAM9                                                                                                                                                                                                                                                                                                                                      |
| GO:0019220~regulation of phosphate metabolic process                                                    | 18    | 0.010   | CDC6, CDK5R1, TGFBR2, IGF1, STRADB, PRKCE, PRKCD, PTEN, CDKN1C, CD80, TSC1, EREG, RGS4, CKS2, TGFA, GADD45A, HTR2A, ADAM9                                                                                                                                                                                                                                                                                                                                      |
| GO:0048666~neuron development                                                                           | 17    | 0.001   | KLF7, RET, CDK5R1, STX3, OTX2, GJA1, HPRT1, PTEN, CDKN1C, ATP2B2, ADM, DYNLL2, ULK2, UBC, SNAP25, FEZ2, KALRN                                                                                                                                                                                                                                                                                                                                                  |
| GO:0008285~negative regulation of cell proliferation                                                    | 17    | 0.001   | CDC6, FGFRL1, PPARG, TGFBR2, GJA1, SMAD1, PTEN, CDKN1C, ADM, TSC1, EREG, BTG1, MDM4, AXIN2, LDOC1, FOSL1, TOB1                                                                                                                                                                                                                                                                                                                                                 |
| GO:0032268~regulation of cellular protein metabolic                                                     | 17    | 0.017   | EIF4E3, CPEB2, EIF5, BARHL2, IGF1, CPEB1, PRKCE, PRKCD, EIF4G2, CD80, TSC1, UBC, QKI, SH3D19, MIF4G4, TNRC6A, ADAM9                                                                                                                                                                                                                                                                                                                                            |

| process                                                                         |    |       |                                                                                                       |  |
|---------------------------------------------------------------------------------|----|-------|-------------------------------------------------------------------------------------------------------|--|
| GO:0030030~cell projection organization                                         | 16 | 0.004 | KLF5, KLF7, CDK5R1, STX3, OTX2, GJA1, HPRT1, PTEN, ATP2B2, ADM, TSC1, ULK2, UBC, SNAP25, FEZ2, KALRN  |  |
| GO:0045944~positive regulation of transcription from RNA polymerase II promoter | 16 | 0.004 | MAF, KLF6, MAFB, PPARG, MITF, IGF1, RHOQ, SMAD1, CFBF, NR1P1, EPC1, HOXB1, S1PR1, MTF1, IRF1, FOSL1   |  |
| GO:0051338~regulation of transferase activity                                   | 15 | 0.010 | CDC6, CDK5R1, TGFB2, PPARG, STRADB, PTEN, CDKN1C, TSC1, EREG, RGS4, CKS2, TGFA, GADD45A, HTR2A, ADAM9 |  |
| GO:0010608~posttranscriptional regulation of gene expression                    | 14 | 0.000 | EIF4E3, CPEB2, EIF5, BARHL2, CPEB1, SMAD1, PTEN, PRKCD, EIF4G2, TSC1, QKI, MDM4, TNRC6A, MIF4GD       |  |
| GO:0007167~enzyme linked receptor protein signaling pathway                     | 14 | 0.012 | RET, TGFB2, PTPRA, RHOQ, SMAD1, GREM2, PTEN, EPHA3, RPS6KA5, EREG, SOS1, ADAM9, TOB1, ACVR1           |  |
| GO:0045859~regulation of protein kinase activity                                | 14 | 0.013 | CDC6, CDK5R1, TGFB2, STRADB, PTEN, CDKN1C, TSC1, EREG, RGS4, CKS2, TGFA, GADD45A, HTR2A, ADAM9        |  |
| GO:0043549~regulation of kinase activity                                        | 14 | 0.017 | CDC6, CDK5R1, TGFB2, STRADB, PTEN, CDKN1C, TSC1, EREG, RGS4, CKS2, TGFA, GADD45A, HTR2A, ADAM9        |  |
| GO:0032989~cellular component morphogenesis                                     | 14 | 0.036 | CDK5R1, KLF7, AGFG1, OTX2, GJA1, STRADB, HPRT1, ATP2B2, ADM, ULK2, UBC, SNAP25, FEZ2, KALRN           |  |
| GO:0008284~positive regulation of cell proliferation                            | 14 | 0.047 | KLF5, NRAS, S1PR1, EREG, BLOC1S2, CD80, ADM, TGFB2, TGFA, IGF1, MDM4, MAB21L1, FOSL1, HTR2A           |  |
| GO:0048514~blood vessel morphogenesis                                           | 13 | 0.001 | RTN4, KLF5, TGFB2, PTEN, PNPLA6, S1PR1, MEOX2, NUS1, EREG, QKI, TGFA, C1GALT1, ACVR1                  |  |
| GO:0001568~blood vessel development                                             | 13 | 0.002 | RTN4, KLF5, TGFB2, PTEN, PNPLA6, S1PR1, MEOX2, NUS1, EREG, QKI, TGFA, C1GALT1, ACVR1                  |  |
| GO:0001944~vasculature development                                              | 13 | 0.003 | RTN4, KLF5, TGFB2, PTEN, PNPLA6, S1PR1, MEOX2, NUS1, EREG, QKI, TGFA, C1GALT1, ACVR1                  |  |
| GO:0031175~neuron projection development                                        | 13 | 0.003 | KLF7, CDK5R1, STX3, ADM, ULK2, OTX2, UBC, GJA1, HPRT1, SNAP25, PTEN, FEZ2, KALRN                      |  |
| GO:0000902~cell morphogenesis                                                   | 13 | 0.036 | ATP2B2, KLF7, CDK5R1, ADM, ULK2, OTX2, UBC, GJA1, STRADB, HPRT1, SNAP25, FEZ2, KALRN                  |  |
| GO:0001525~angiogenesis                                                         | 12 | 0.000 | KLF5, RTN4, S1PR1, NUS1, MEOX2, EREG, TGFB2, TGFA, PTEN, C1GALT1, PNPLA6, ACVR1                       |  |
| GO:0010647~positive regulation of cell communication                            | 12 | 0.045 | CDKN1C, TMED7, NRAS, CD80, EREG, MIER1, SOS1, UBC, ESR1, TGFA, GJA1, IGF1                             |  |
| GO:0051726~regulation of cell cycle                                             | 12 | 0.048 | CDKN1C, TRIAP1, CDC6, CDK5R1, EREG, SKP2, CKS2, TGFA, IGF1, FOSL1, GADD45A, PTEN                      |  |
| GO:0051960~regulation of nervous system development                             | 11 | 0.003 | RTN4, ACTR3, CDK5R1, BARHL2, PPARG, UBC, NPTN, IGF1, SMAD1, SNAP25, KALRN                             |  |
| GO:0048812~neuron projection morphogenesis                                      | 11 | 0.007 | KLF7, CDK5R1, ADM, ULK2, OTX2, UBC, GJA1, HPRT1, SNAP25, FEZ2, KALRN                                  |  |
| GO:0045321~leukocyte activation                                                 | 11 | 0.016 | KLF6, CD80, TGFB2, IRF1, HPRT1, TPD52, PRKCD, HELLS, CFBF, ZNF3, ADAM9                                |  |
| GO:0048858~cell projection morphogenesis                                        | 11 | 0.017 | KLF7, CDK5R1, ADM, ULK2, OTX2, UBC, GJA1, HPRT1, SNAP25, FEZ2, KALRN                                  |  |
| GO:0032990~cell part morphogenesis                                              | 11 | 0.022 | KLF7, CDK5R1, ADM, ULK2, OTX2, UBC, GJA1, HPRT1, SNAP25, FEZ2, KALRN                                  |  |
| GO:0001775~cell activation                                                      | 11 | 0.044 | KLF6, CD80, TGFB2, IRF1, HPRT1, TPD52, PRKCD, HELLS, CFBF, ZNF3, ADAM9                                |  |
| GO:0006351~transcription, DNA-dependent                                         | 11 | 0.048 | KLF5, MAF, TROVE2, TAF13, ZNF217, EREG, MED26, ESR1, IRF1, FOSL1, CFBF                                |  |
| GO:0006417~regulation of translation                                            | 10 | 0.001 | EIF4G2, EIF4E3, CPEB2, TSC1, BARHL2, EIF5, QKI, CPEB1, MIF4GD, TNRC6A                                 |  |
| GO:0060284~regulation of cell development                                       | 10 | 0.015 | RTN4, ACTR3, CDK5R1, BTG1, BARHL2, PPARG, UBC, NPTN, SMAD1, KALRN                                     |  |
| GO:0048667~cell morphogenesis involved in neuron differentiation                | 10 | 0.017 | ATP2B2, KLF7, CDK5R1, ULK2, OTX2, UBC, HPRT1, SNAP25, FEZ2, KALRN                                     |  |
| GO:0000904~cell morphogenesis involved in differentiation                       | 10 | 0.040 | ATP2B2, KLF7, CDK5R1, ULK2, OTX2, UBC, HPRT1, SNAP25, FEZ2, KALRN                                     |  |
| GO:0010648~negative regulation of cell communication                            | 10 | 0.044 | TSC1, RGS4, EZH2, AXIN2, FRZB, PRKCD, PTEN, TOB1, HTR2A, ACVR1                                        |  |
| GO:0046578~regulation of Ras protein signal transduction                        | 9  | 0.044 | NRAS, FICD, S1PR1, AGFG1, TSC1, SOS1, SOS2, IGF1, KALRN                                               |  |
| GO:0007517~muscle organ development                                             | 9  | 0.045 | MTM1, TSC1, MEOX2, MRAS, IGF1, HOMER1, PTEN, FXR1, SERP1                                              |  |
| GO:0044087~regulation of cellular component biogenesis                          | 8  | 0.017 | ACTR3, S1PR1, TSC1, ARPC3, UBC, RHOQ, SNAP25, PTEN                                                    |  |
| GO:0016311~dephosphorylation                                                    | 8  | 0.026 | MTM1, PPP6C, CDC14A, SBF2, PTPRA, MTMR9, MTMR6, PTEN                                                  |  |
| GO:0050767~regulation of neurogenesis                                           | 8  | 0.037 | RTN4, ACTR3, CDK5R1, BARHL2, PPARG, NPTN, SMAD1, KALRN                                                |  |
| GO:0009894~regulation of catabolic process                                      | 7  | 0.009 | CST3, GJA1, IGF1, PNPLA2, SH3D19, MDM4, ADAM9                                                         |  |
| GO:0051329~interphase of mitotic cell cycle                                     | 7  | 0.013 | CDKN1C, PPP6C, CDC6, SKP2, RHOQ, GADD45A, ACVR1                                                       |  |
| GO:0051325~interphase                                                           | 7  | 0.015 | CDKN1C, PPP6C, CDC6, SKP2, RHOQ, GADD45A, ACVR1                                                       |  |
| GO:0007568~aging                                                                | 7  | 0.017 | NRAS, TFRC, ADM, LOXL2, PRKCD, PTEN, HTR2A                                                            |  |
| GO:0050804~regulation of synaptic transmission                                  | 7  | 0.043 | ATP2B2, NRAS, SNCG, UBC, NPTN, PATE4, HTR2A                                                           |  |
| GO:0000079~regulation of cyclin-dependent protein kinase activity               | 6  | 0.003 | CDKN1C, CDC6, CDK5R1, CKS2, GADD45A, PTEN                                                             |  |
| GO:0040029~regulation of gene expression, epigenetic                            | 6  | 0.015 | EPC1, CREBZF, SMAD1, HMGA1, TNRC6A, HELLS                                                             |  |

|                                                                                      |   |       |                                              |
|--------------------------------------------------------------------------------------|---|-------|----------------------------------------------|
| GO:0010959~regulation of metal ion transport                                         | 6 | 0.018 | ATP2B2, CACNA2D1, GJA1, HOMER1, CALM2, HTR2A |
| GO:0031344~regulation of cell projection organization                                | 6 | 0.026 | RTN4, ACTR3, BARHL2, RHOQ, SMAD1, KALRN      |
| GO:0043269~regulation of ion transport                                               | 6 | 0.038 | ATP2B2, CACNA2D1, GJA1, HOMER1, CALM2, HTR2A |
| GO:0007178~transmembrane receptor protein serine/threonine kinase signaling pathway  | 6 | 0.044 | TGFBR2, SMAD1, GREM2, ADAM9, TOB1, ACVR1     |
| GO:0009896~positive regulation of catabolic process                                  | 5 | 0.013 | GJA1, IGF1, PNPLA2, SH3D19, ADAM9            |
| GO:0031329~regulation of cellular catabolic process                                  | 5 | 0.027 | CST3, IGF1, PNPLA2, SH3D19, ADAM9            |
| GO:0051924~regulation of calcium ion transport                                       | 5 | 0.040 | ATP2B2, CACNA2D1, GJA1, HOMER1, CALM2        |
| GO:0010975~regulation of neuron projection development                               | 5 | 0.042 | RTN4, ACTR3, BARHL2, SMAD1, KALRN            |
| GO:0048661~positive regulation of smooth muscle cell proliferation                   | 4 | 0.020 | S1PR1, EREG, TGFBR2, IGF1                    |
| GO:0031331~positive regulation of cellular catabolic process                         | 4 | 0.029 | IGF1, PNPLA2, SH3D19, ADAM9                  |
| GO:0051147~regulation of muscle cell differentiation                                 | 4 | 0.036 | EREG, BTG1, EZH2, UBC                        |
| GO:0045667~regulation of osteoblast differentiation                                  | 4 | 0.046 | SMAD1, AXIN2, TOB1, ACVR1                    |
| GO:0045742~positive regulation of epidermal growth factor receptor signaling pathway | 3 | 0.017 | EREG, SOS1, TGFA                             |
| GO:0050773~regulation of dendrite development                                        | 3 | 0.031 | ACTR3, SMAD1, KALRN                          |
| GO:0010469~regulation of receptor activity                                           | 3 | 0.044 | EREG, TGFA, PRKCD                            |

### Supplemental table s5. GO Term of Cellular Component

| Term                         | Count | p Value | Genes                                                        |
|------------------------------|-------|---------|--------------------------------------------------------------|
| GO:0000932~cytoplasmic       | 5     | 0.001   | DPC2, PNRC2, CPEB1, TNRC6A, DDX6                             |
| GO:0005768~endosome          | 15    | 0.001   | MMGT1, LDLR, SNX27, GNPAT1, MMD, VPS37A, GJA1, MARCH3,       |
| GO:0030426~growth cone       | 5     | 0.014   | CDK5R1, STX3, TSC1, OTX2, SNAP25                             |
| GO:0030427~site of polarized | 5     | 0.015   | CDK5R1, STX3, TSC1, OTX2, SNAP25                             |
| GO:0043025~cell soma         | 8     | 0.027   | RTN4, ATP2B2, SNCG, CDK5R1, AGFG1, SOS1, ESR1, KALRN         |
| GO:0009897~external side of  | 8     | 0.029   | S1PR1, CD80, ATP6AP2, CD69, GPC6, TGFBR2, MMP15, ADAM9       |
| GO:0043005~neuron projection | 12    | 0.037   | ATP2B2, ANKS1B, SNCG, CDK5R1, STX3, TSC1, OTX2, ESR1, CPEB1, |
| GO:0031225~anchored to       | 9     | 0.038   | NRAS, ART3, BST1, GPC6, PALM3, RHOQ, PRNP, RHO, SNAP25       |
| GO:0045202~synapse           | 12    | 0.046   | ACTR3, ANKS1B, CDK5R1, SYT10, SOS1, NPTN, CPEB1, HOMER1,     |
